# Supplementary material for: Demand-side financing in the form of baby packages in Northern Mozambique: Results from an observational study
Source: PLoS One. 2019 May 9;14(5):e0215282. doi: 10.1371/journal.pone.0215282 (PMC6508657; doi:10.1371/journal.pone.0215282)
Supplement: S1 Table — (XLSX) [file pone.0215282.s001.xlsx]

## Sheet: Data
	Total Population										Expected Deliveries = Total Population x 0,045 (4,5%)										Realized Institutional Deliveries according to NHIS
	2006	2007	2008	2009	2010	2011	2012	2013	2014		2006	2007	2008	2009	2010	2011	2012	2013	2014		2006	2007	2008	2009	Jan-May 2010	June - Dec 2010	2011	2012	2013	2014
Pemba City	135438	141082	147015	153328	160023	167104	174572	182446	190741		6094.69	6348.69	6615.68	6899.76	7201.03	7519.68	7855.74	8210.07	8583.34		4767	5653	6575	5932	2972	4135	7188	7828	7871	8255
Ancuabe	104694	109057	110858	112610	114304	115932	117488	118926	120205		4711.22	4907.56	4988.61	5067.45	5143.68	5216.94	5286.96	5351.67	5409.22		1619	2133	2783	2741	1186	3205	5790	6464	6134	6857
Balama	121134	126182	128561	130893	133168	135376	137506	139508	141331		5451.02	5678.19	5785.24	5890.18	5992.56	6091.92	6187.77	6277.86	6359.89		1619	2061	2822	2557	1170	1793	3705	3662	3850	3715
Chiure	212425	221278	224572	227933	231348	234806	238297	241754	245116		9559.13	9957.51	10105.7	10257	10410.7	10566.3	10723.4	10878.9	11030.2		2588	3654	4902	5786	2749	3946	6667	6369	7321	9371
Ibo	9125.69	9506	9748	10001	10266	10542	10828	11125	11429		410.656	427.77	438.66	450.045	461.97	474.39	487.26	500.625	514.305		243	293	346	380	143	192	332	368	284	349
Macomia	77989.8	81240	82371	83548	84764	86011	87283	88556	89807		3509.54	3655.8	3706.69	3759.66	3814.38	3870.49	3927.73	3985.02	4041.32		1454	2101	2128	2123	1012	1704	2926	3059	3107	3231
Mecufi	42262.7	44024	44697	45348	45975	46573	47141	47660	48115		1901.82	1981.08	2011.37	2040.66	2068.88	2095.78	2121.34	2144.7	2165.17		821	1027	1275	1515	698	1052	1737	1906	1628	1741
Meluco	24072.8	25076	25236	25400	25564	25726	25882	26022	26135		1083.27	1128.42	1135.62	1143	1150.38	1157.67	1164.69	1170.99	1176.08		473	622	676	591	292	586	906	939	1124	1216
Mocimboa da Praia	88340.4	92022	93768	95608	97534	99538	101613	103740	105901		3975.32	4140.99	4219.56	4302.36	4389.03	4479.21	4572.59	4668.3	4765.55		2074	2263	2551	2613	1035	1654	3032	3266	3889	3800
Montepuez	189103	196984	201040	205159	209326	213524	217736	221915	226012		8509.64	8864.28	9046.8	9232.15	9419.67	9608.58	9798.12	9986.17	10170.5		3376	3667	4139	4941	2406	3558	6183	6499	7030	7486
Mueda	111121	115752	117303	118893	120512	122150	123800	125427	126998		5000.45	5208.84	5278.64	5350.18	5423.04	5496.75	5571	5644.22	5714.91		2508	2633	3280	3540	1712	2869	4142	3627	3087	3298
Muidumbe	71148.9	74114	74865	75583	76263	76900	77489	78003	78414		3201.7	3335.13	3368.92	3401.23	3431.84	3460.5	3487	3510.13	3528.63		1131	1373	1310	1788	934	1395	2268	2400	2397	1987
Namuno	175077	182373	186385	190350	194252	198076	201807	205368	208681		7878.45	8206.78	8387.32	8565.75	8741.34	8913.42	9081.32	9241.56	9390.65		3370	4559	3996	4247	1965	2461	4201	4652	5959	6041
Nangade	61240.8	63793	64917	66015	67081	68111	69100	70022	70852		2755.84	2870.68	2921.26	2970.67	3018.64	3064.99	3109.5	3150.99	3188.34		754	845	860	1104	394	722	1472	1324	1272	1296
Palma	47195.1	49162	49669	50154	50612	51041	51438	51784	52061		2123.78	2212.29	2235.11	2256.93	2277.54	2296.84	2314.71	2330.28	2342.74		1043	1266	1243	1526	596	1007	1405	1497	1553	1719
Pemba Metuge	61515.3	64079	66304	68557	70832	73123	75425	77707	79939		2768.19	2883.55	2983.68	3085.07	3187.44	3290.53	3394.12	3496.82	3597.25		968	1141	1217	1383	617	946	1900	2062	2140	2342
Quissanga	36899.2	38437	38760	39074	39375	39661	39928	40162	40348		1660.46	1729.66	1744.2	1758.33	1771.88	1784.74	1796.76	1807.29	1815.66		331	549	846	844	306	364	1032	1041	1144	1368
Whole Province	1.56878e+06	1634162	1666070	1698456	1731200	1764194	1797335	1830124	1862085		70595.2	73537.3	74973.1	76430.5	77904	79388.7	80880.1	82355.6	83793.8		29139	35840	40949	43611	20187	31589	54886	56963	59790	64072
Nr of BP distributed in Ancuabe according to INTERNAL sheet																										3133	5856	6458	6118	6857
Nr of women from other Districts coming to Ancuabe according to INTERNAL sheet																										0	0	119	179	na
Non-institutional deliveries = expected deliveries minus institutional deliveries
